# Supplementary material for: Spectral Analysis of Groundwater Level Time Series for Robust Estimation of Aquifer Response Times
Source: Copernicus journal article supplement (doi:10.5194/egusphere-2025-5666), 2025-11-20
Supplement: Supplementary file [file egusphere-2025-5666-AC1-supplement.pdf]

## Author's response to:

RC1: 'Comment on egusphere-2025-5666', Anonymous Referee #1, 27 Dec 2025 reply

### Summary

The manuscript by Houben et al presents a methodology that combines time series analysis, GIS and analytical modelling to estimate the average response time of aquifers in a large, regional data set of groundwater level time series from observation wells in the upper Danube river basin. The approach rests on existing findings by (i.a. Houben et al., 2022; Liang & Zhang; Zhang & Schilling, 2004) regarding temporal scaling of groundwater head and relation to aquifer geometry, properties and recharge. Here, the focus was on estimating at each location the characteristic time scale, a single value that quantifies the rate at which an aquifer responds to an external stress. This value is then briefly framed as a characteristic to quantify aquifer vulnerability to drought and criteria for selection of aquifers for abstraction. While the approach generally is sound, my primary concern with this paper is **that the value of the analysis is not apparent when compared to other studies that require fewer data, assumptions, and less effort, such as the referenced study by Kumar et al. (2016) or Ebeling et al. (2025). What benefit does the characteristic time scale provide versus the current standard method in groundwater drought analysis using correlation times of SP(E)I vs SGI for example or e.g. cross-correlations (e.g., Bloomfield & Marchant, 2013; Ebeling et al., 2025)?** I think the authors need to reflect on - and clarify this before the manuscript can be considered for publication. Below find specific comments:

*Thank you very much for the invested time, the valuable comments on our manuscript and the overall positive scientific evaluation! In the following, we answer the comments as precisely as possible and incorporate the overall motivation and value of the study and its approach. Please find our answers in italics below the respective comment.*

1. The recharge data that is used needs more description for readers not familiar with mHM. What does it represent within the model context, is it the input to a groundwater component?

*Thank you very much for the hint. We will include the following explanation in the methods section of the revised manuscript, where the modelled recharge product is mentioned:*

*In the mHM model three subsurface storages are considered to simulate (i) fast interflow  $q_2$ , (ii) slow interflow  $q_3$  and (iii) baseflow  $q_4$ . Fast and slow interflow originate from the unsaturated zone, an upper storage, while the baseflow is fed by a lower saturated storage. The flow between the upper and the lower storage is estimated as a linear reservoir and is called groundwater recharge or percolation (Figure 2.3 from Kumar et al., 2010). In our study, a recharge product was taken were parts of  $q_3$  have been attributed to the recharge as part of a bias correction in order to match estimated recharge volumes provided by the German Hydrogeological Atlas (von Jangiewicz et al, 2005, Marx et al., 2021).*

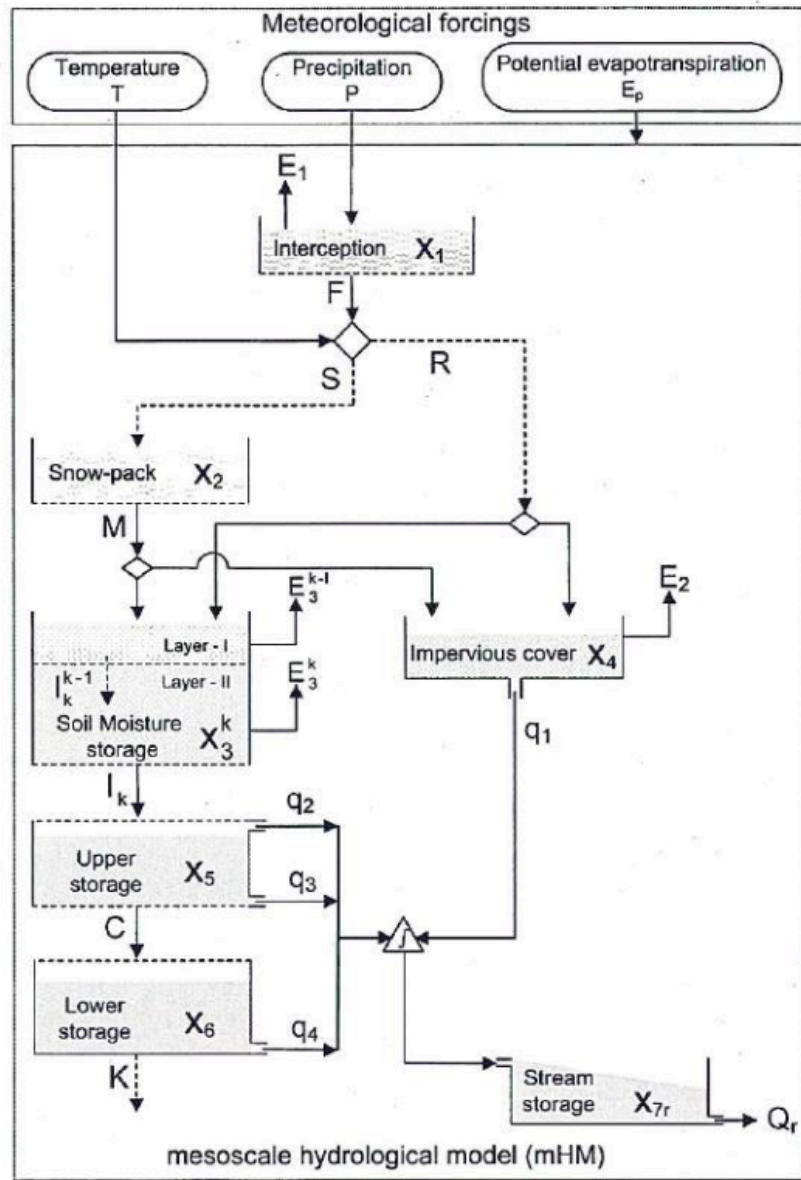

Figure 2.3: Schematic representation of different components accounted in mHM. Where,  $X \equiv$  state variable,  $E \equiv$  actual evapotranspiration,  $q \equiv$  component of runoff,  $S \equiv$  snow precipitation depth,  $R \equiv$  rain precipitation depth,  $F \equiv$  throughfall,  $I \equiv$  infiltration capacity,  $C \equiv$  percolation,  $K \equiv$  gain/loss flux in a leaking cell,  $Q_r \equiv$  net runoff produced at the outlet of a grid cell.

2. Is the recharge calibrated on observation data (lysimeter) or is it the residual from runoff and soil moisture? This distinction is important for understanding the reliability of the input data.

The mHM model was calibrated on observed stream discharge in the context of a multi-basin model calibration strategy, where small subsets of the total 201 basins all over Germany were calibrated individually and later evaluated against the full ensemble. The best performing parameters in terms of the median daily KGE over all 201 basins during a period of 1986-2005 (Boeing et al. 2022) were finally chosen for the model runs. In addition, the model was validated against soil moisture observations from 40 sites in Germany originating from single profile measurements, spatially distributed sensor networks, cosmic-ray neutron stations and lysimeters. High correlations in the vegetation active period (0.84 median correlation  $R$ ) and lower in winter (0.50 median  $R$ ) was achieved (Boeing et al. 2022).

As mentioned in the previous answer, the recharge ( $C$  in Figure 2.3 from Kumar et al., 2010) is a residual from an upper storage and represented as a linear reservoir in the form:

$$C(t) = \beta_{22}X_5(t - 1)$$

Where  $X_5$  is the state of the upper storage (water content),  $\beta_{22}$  is the percolation rate which is composed of the arithmetic mean  $\mathcal{A}$  of the globally calibrated parameters  $\gamma$  through MPR and the saturated hydraulic conductivity  $\mathcal{K}$  after Liang et al. (1994).

$$\beta_{22i} = \mathcal{A} (\gamma_{46} (1 + \|\mathcal{K}_j\| i))$$

This additional information will be provided in the revised manuscript.

3. Given the difficulty of estimating recharge on short temporal scales my expectation would be that this is a significant uncertainty for the study. Discuss the challenges and uncertainties associated with estimating recharge at short temporal scales, and how these uncertainties may affect the study's conclusions.

*Thank you for pointing that out. We agree that the estimated recharge introduces uncertainties to our study, but we evaluate the uncertainty of short temporal scales as minor compared to mid or long temporal scales. Short term recharge fluctuations (shorter than ~7 days) impose the spectrum to rise its right part, leading to less congruent fit of measured groundwater head and fitted spectrum. As long as this does not impact time scales for the mid to low frequency range (center and left part of spectrum) this will not influence the obtained hydrogeological parameters since the fitted spectrum remains on the same place (more weight has been given to the mid and low frequency part). As soon as the fitted spectrum remarkably deviates from the observed spectrum in the mid frequency range (30 – 90 days), we assume an increasing impact on the obtained parameters. We categorize these cases as ‘underestimated’, potentially leading to higher or longer response times, since low frequency components are underrepresented in the fitted spectrum.*

*Moreover, limitations of the complexity of the semi-analytical solution in representing complex slopes of the spectrum make it impossible to match the spectrum across the*

*whole frequency range, especially when multiple slopes are present. Only the category 'good fit' might capture the precise characteristic response of the aquifer, although we consider the category 'underestimation' as still suitable for longer time scale estimations.*

*The present study and the categorization into four distinct goodness of fit groups provides the possibility to evaluate the spectral fit and consequently the uncertainty of the derived parameters due to the underlying recharge.*

*We understand that this should be emphasized throughout the results and discussion part. We will integrate the above elaborations in the reviewed manuscript.*

4. Also related to recharge, in L150 you state that the recharge is extracted from multiple cells and spatially averaged. Why and how?

*We averaged recharge over multiple grid cells to generate a regional signal that reflects the effective aquifer properties across a broader area. This approach assumes that the groundwater level represents a regional signal driven by an averaged, regional recharge connected laterally and hydraulically through the saturated zone in contrast to isolated soil-moisture variations in the vadose zone.*

*Because the exact extent of each hydrological basin and the underlying hydraulic network are unknown without detailed watershed analysis, we adopted a standardized kernel approach. We applied a kernel size of 2, meaning that the recharge values of the central cell (where the well is located), its 8 immediate neighbors, and the 16 second-ring neighbors were averaged. Thus, each calculation incorporated 25 cells, each roughly  $1 \times 1$  km, covering a  $5 \times 5$  km ( $25 \text{ km}^2$ ) area.*

*Figure A3 (appendix) in the manuscript shows the resulting aquifer lengths (L) of the flow line length estimation. For the spectral-analysis parameter set used in the paper ( $t = 1000$ ,  $fl = \text{direct}$ ,  $s = 2$ , green in Figure A3), the maximum flow-line lengths (L) are around 5 km. Therefore, a kernel size of 2 was considered appropriate.*

*Figure 2b (top) in the manuscript briefly illustrates this process. In the revised manuscript, we will add the above explanation to the methods section and reference Figure 2b (top) explicitly.*

5. This also assumes localized recharge for all wells, which is a standard approach in 1D modelling approaches. You are however using a 2D conceptualization, where the standard perceptual models consider recharge/intermediate/discharge zones (e.g. Tóthian basins or Winter's hydrologic landscapes) Clarify the assumption that localized recharge is appropriate for all wells. Discuss how this assumption fits and acknowledge any additional uncertainties introduced.

*Thank you for pointing this out. Certainly, the localized recharge approach is an assumption that does not hold for every hydrogeological setting. This assumption was already introduced by Liang and Zhang (2013) as prerequisite for the stochastic*

*derivation of the semi-analytical solution of the head spectrum. Their model considers a 2D-groundwater surface according to the Dupuit assumptions but a spatially consistent recharge rate. According to the assumptions of their derivation, we consequently were tight to these when we applied the solution. We searched for a way to find reasonable recharge estimate, representative for the full hillslope and finally developed the spatial averaging workflow explained in the previous answer.*

*Tóth (1963) distinguishes between three types of flow systems in small basins: local, intermediate, and regional. Within these systems, recharge and discharge areas alternate, meaning only specific portions of a hillslope contribute to the discharge of the main stream. Consequently, only a fraction of the recharge calculated for the entire hillslope may ultimately reach a specific well, while other wells may receive water from distant uphill recharge zones via regional flow systems.*

*This spatial variability can cause a mismatch between the applied recharge and observed groundwater fluctuations, leading to inaccurate response time estimates or a poor spectral fit. Ultimately, ignoring the connectivity of the basin may result in an incorrect estimation of  $t_c$ . To mitigate this limitation, we selected shallow wells (less than 100 m deep) for this analysis. However, even in shallow systems, uncertainties remain; for example, if an aquifer is confined, it may receive water from distal sources rather than local recharge. Therefore, this tool may be more effective for unconfined sediments than for fully confined aquifers. Through the goodness of fit evaluation in the manuscript, we are able to identify conditions where the approach works and where higher uncertainties remain. We will emphasize the difference between the categories in the revised work.*

6. Improve the description of the groundwater level data set that was used. Currently it is not clear what temporal resolution the data has, or if it is regular.

*The groundwater level time series had different sampling intervals and irregular lengths. Since spectral analyses requires equidistant time steps, the time series were interpolated to a daily time step. The derivation of the semi-analytical solution assumes a stationary process, which is not always the case for the analyzed groundwater level time series. Roughly 25 % of the time series had severe jumps or inconsistencies in the recorded data due to changing sampling interval or other artefacts, thus these time series were screened and a representative period was selected for further processing. The final selected time series including highlighted and removed outliers and interpolated data are available in the Zenodo upload (Houben, 2026).*

7. The outlier handling using the inter-quartile range is generally inappropriate for groundwater level time series due to their seasonality and thus potential for outliers that are not overall extreme values. Likely this is not important when the time series are transformed into the frequency domain. However, please elaborate on this issue.

*We agree that the inter-quartile range is generally not always appropriate for the groundwater levels with seasonality. Though, we found this approach as valuable and practical and evaluated the results, i.e., removed outliers as successful, thus continued*

*with the resulting time series. Only few very strong outliers exceeding the overall seasonality were finally removed. In future studies, we suggest using other techniques such as the Local Outlier Factor where time windows of data points can be considered in order to cope with seasonality in time series. Furthermore, we recommend using tools such as SaQC (Schmidt et al. 2023) for quality control of time series, data flagging and data correction.*

8. The entire section LL183-193 is hard to follow and should be rewritten. Specific questions in these sections are:
  - L183: What is meant by tracing “back” the path of the water particle towards the river?
  - The sentence L189-190 is hard to understand. Is this the flow path from water divide to river?
  - L191 Why was the direct distance applied?

*Thank your suggestions. Indeed, there is a small error in the explanation. We have rewritten the section and clarified the open questions. The new section reads:*

*Next, we approximate the flow lines (FL) by tracing the path of the water particle along the surface (DEM) starting at the observation well down-slope following a flow direction map towards the river (blue, Fig. 2). For the upper part, the part between the well and the water divide, the flow direction was reversely applied, i.e., the directional vector of each cell was rotated by 180 degrees, then followed from cell to cell and finally stopped when a summit was reached, leading to a unique uphill path (red, Fig. 2).*

*Real groundwater paths can be very complex and are usually unknown without detailed on-site experiments on the catchment scale. Since our study has a regional focus, we decided to use flow direction maps derived from the DEM, automate the process and obtain estimates of the FL for a few hundred wells without manual inspection of each hydrogeological scenario. The used flow direction maps, though, are often very noisy, in particular in flat regions. In order to remove noisy patterns, avoid unreasonably short flow lines and obtain robust estimates, we smoothed the flow direction map (Appendix A1).*

*The actual path of the water particle along the hill slope (from water divide, intersecting the well towards the river) represents the longest possible path to be obtained with our method which we called the ‘arc length’ (Fig. 2c), while the shortest and straight distance is called the ‘direct’ path. We considered the ‘direct’ path as more appropriate since the geomorphological surface introduced curves in the estimated flow paths which are presumably not present in the subsurface flow paths (Fig. 2), thus we considered the ‘direct’ path as better suited.*

9. In LL242ff does this analysis only pertain to all time series or only good fits?

*This analysis pertains to all analyzed spectra. We will make this clear in the text. Potentially, we will exclude the irregular fitting spectra from the summary and further evaluation and also discuss the implications for the other categories in more detail.*

10. In L290 you refer to intermediate frequencies as the “onset of filtering related to the groundwater response time”. This description does not help with intuition. Can you clarify what this might mean process-wise?

*Thank you for pointing this out. We try to clarify this further:*

*As the aquifer acts as a low pass filter, low frequency components are mostly unaltered while the recharge signal passes the subsurface. The intermediate-frequency band corresponds to the break-point where the aquifer’s low-pass filtering begins to attenuate the input signal, which, in turn, corresponds to the system’s characteristic time.*

11. Finally, (Ebeling et al., 2025; Kumar et al., 2016) carried out studies in the same regions and also link deeper wells to longer response times, although here responses of multiple years are identified. Reflect on the differences between  $t_c$  and accumulation times, and how  $t_c$  can be understood and used for groundwater drought analysis compared to current practice.

*Thank you for stressing this important connection to studies from Kumar et al. (2016) and Ebeling (2025). Indeed, all studies (Kumar et al., 2016, Ebeling et al., 2025, Bloomfield & Marchant, 2013, Houben et al. 2025) evaluate the response of groundwater table to external perturbation, though fundamental differences exist:*

1. *Kumar et al. (2016), Ebeling et al. (2025) and Bloomfield & Marchant (2013), examined the cross-correlation between the Standardized Precipitation Index (SPI) and the Standardized Groundwater Index (SGI), using the relationship to estimate how groundwater levels respond to meteorological drivers. Their analysis effectively incorporates the delay introduced by the unsaturated vadose zone, allowing for a response time evaluation that accounts for this lag. By contrast, our method bypasses the vadose zone entirely: we take recharge as a product from mHM (which already accounts for soil moisture and percolation) directly as the input and compute the aquifer’s response to this input, thereby isolating the aquifer dynamics from the effects of the unsaturated zone. The resulting response times therefore characterize the aquifer itself excluding any effects from the vadose zone. Comparing these two approaches, it becomes obvious why response times from Kumar et al. (2016) and Ebeling et al. (2025) exhibit longer times than the response times obtained by the spectral analysis approach. Furthermore, the correlation of longer times in relation to the depth of the well is more pronounced since the vadose zone plays a significant role.*
2. *Our spectral analysis approach uses a full spectrum wide comparison over multiple frequencies and finds a best fitting spectrum, in contrast to Ebeling et al. (2025) and Kumar et al. (2016) where only a best fitting accumulation period was calculated.*
3. *Our approach links the response time directly to physical properties of the aquifer since corresponding (and simplified) equations of groundwater flow are used.*

*Current practices in groundwater drought analysis (e.g., Kumar et al., 2016; Ebeling et al., 2025) typically rely on accumulation times derived from the correlation between standardized indices (SPI/SPEI vs. SGI) and these metrics primarily provide insight into the "hydrological lag" which is the time required for a climatic deficit to propagate through the soil and vadose zone to reach the water table. In contrast, the characteristic response time  $t_c$  derived from spectral analysis characterizes how the saturated aquifer itself processes and moderates that stress once it has arrived.*

*Mathematically and physically, these two metrics describe different segments of the hydrological cycle. The accumulation time is a statistical window representing the system's total memory (soil + vadose zone + aquifer), whereas  $t_c$  is an intrinsic hydraulic parameter defined by the aquifer's dimensions and its ratio of storage to transmissivity. Consequently, high accumulation times do not necessarily imply long characteristic response times. A system may exhibit a multi-year accumulation lag due to a thick, slow-draining vadose zone, yet possess a short (e.g., < 50 days), indicating that the saturated zone has little capacity to buffer against high-frequency fluctuations or localized abstraction stress.*

### ***Implications for Drought Evaluation***

*In the context of drought evaluation and management, the following holds:*

- *By using recharge time series (e.g., from mHM) as the spectral input, our approach cleans the signal. It separates the influence of the vadose zone from the saturated zone, allowing managers to identify whether a well's apparent resilience is due to surface-level delays or the intrinsic buffering capacity of the aquifer.*
- *While accumulation times tell us when a drought begins to manifest in the groundwater,  $t_c$  determines the recession rate and the recovery potential. A short  $t_c$  suggests a flashy system that may reach critical levels quickly during a recharge failure but can recover rapidly after a single wet season.*
- *For sustainable groundwater management, both values must be analyzed in conjunction. An aquifer with both long accumulation times and a high  $t_c$  represents a highly resilient strategic reserve. Conversely, an aquifer with a long accumulation lag but a short is deceptively vulnerable: it may appear stable during the early stages of a drought, but once the deficit reaches the water table, the system lacks the hydraulic capacity to dampen the impact, leading to rapid level declines.*

*For the revision of the manuscript, we will integrate the extended elaboration from above in the discussion section and adapt according sections in the introduction.*

### **Technical comments**

- In abstract you write “nearly 200 ... wells”, but in section 2.2.2 it is 224.
  - Will be corrected to ‘around 200 wells’

- L46ff: Clarify how variability in recession constants are related to the difficulty in defining drought extent? I challenge that defining drought extent is really that difficult, it is a factor of the systems hydraulic memory (Changnon, 1987).

*Changnon et al. (1987) developed a practical framework for detecting the onset, severity, and termination of droughts by monitoring precipitation, soil-moisture levels, shallow groundwater levels, and streamflow. In the groundwater system, a drought is classified as moderate when groundwater levels fall more than 30 % below the long-term mean for at least three consecutive months, and as severe when the decline exceeds 55 % for at least twelve months. Identifying the end of a drought is more complex; it generally requires a rise in soil moisture accompanied by several months of excess precipitation.*

*Under the linear-reservoir approximation, the time needed for groundwater levels to drop below a drought-threshold is directly related to the recession constant. Hameed et al. (2023) applied this concept by analysing individual base-flow events from 1990–2019, extracting them from streamflow records with complementary precipitation data, and estimating the corresponding recession constants. Although the drought definition is straightforward in theory, inverse estimation of response times from time-series data introduces uncertainties that can cause variations in the derived recession constants, even for a single hydrograph.*

*Lee and Ajami (2023) further emphasized that baseflow drought should be viewed as a process rather than an instantaneous event. Because baseflow responds delayed and dampened to precipitation, they adopted the concept of an intermittent above-zero standardised baselow Index (SBI) during drought periods introduced by Perri et al. (2016).*

*In summary, while Changnon et al. (1987) provide a clear observational framework for drought definition, practical application, particularly when employing inverse time-series techniques (Lee & Ajami, 2023, Hameed et al., 2023, Perry et al., 2016), yields variability in recession constants. These challenges can be mitigated by adopting our spectral-analysis approach, which obviates the need to delineate start and end points and instead considers the entire frequency spectrum simultaneously.*

- Fig1 Please elaborate on b,c in caption
  - b) *Spectrum of groundwater time series, c) corresponding groundwater time series*
- Fig 2 Please elaborate on a,b,c,d in the caption. Also the arc length and direct path are not clearly visible. Please improve. For a and b write descriptive titles for each step.
  - *Thank you for the suggested improvements. We will adapt the figure in review. The following will be added to the figure description:*
  - *a) processing of groundwater level time Series and transfer to frequency domain, b) extraction of recharge time series from spatio-temporal simulations of the mesoscale hydrological model mHM and spatially averaged for shaded region, c) DEM processing and consecutive flow line (FL) estimation. D) measured*

*groundwater level spectrum fitted with semi-analytical solution with  $t_c$  and  $S$  subject to optimization*

- L187 noise --> noisy
  - Will be corrected.

## References from Reviewers

Bloomfield, J. P., & Marchant, B. P. (2013). Analysis of groundwater drought building on the standardised precipitation index approach. *Hydrol. Earth Syst. Sci.*, 17(12), 4769-4787.

<https://doi.org/10.5194/hess-17-4769-2013>

Changnon, S. A. (1987). Detecting drought conditions in Illinois. *Circular no. 169*.

Ebeling, P., Musolff, A., Kumar, R., Hartmann, A., & Fleckenstein, J. H. (2025). Groundwater head responses to droughts across Germany. *Hydrol. Earth Syst. Sci.*, 29(13), 2925-2950.

<https://doi.org/10.5194/hess-29-2925-2025>

Houben, T., Pujades, E., Kalbacher, T., Dietrich, P., & Attinger, S. (2022). From Dynamic Groundwater Level Measurements to Regional Aquifer Parameters— Assessing the Power of Spectral Analysis. *Water Resources Research*, 58(5). <https://doi.org/10.1029/2021wr031289>

Kumar, R., Musuza, J. L., Van Loon, A. F., Teuling, A. J., Barthel, R., Ten Broek, J., Mai, J., Samaniego, L., & Attinger, S. (2016). Multiscale evaluation of the Standardized Precipitation Index as a groundwater drought indicator. *Hydrol. Earth Syst. Sci.*, 20(3), 1117-1131.

<https://doi.org/10.5194/hess-20-1117-2016>

Liang, X., & Zhang, Y.-K. (2013). Temporal and spatial variation and scaling of groundwater levels in a bounded unconfined aquifer. *Journal of Hydrology*, 479, 139-145.

<https://doi.org/10.1016/j.jhydrol.2012.11.044>

## References from Authors

Boeing et al., “High-resolution drought simulations and comparison to soil moisture observations in Germany,” *Hydrology and Earth System Sciences*, vol. 26, no. 19, pp. 5137–5161, Oct. 2022, doi: 10.5194/hess-26-5137-2022.

M. Hameed, M. A. Nayak, and M. A. Ahanger, “Event-Based Recession Analysis for Estimation of Basin-Wide Characteristic Drainage Timescale and Groundwater Storage Trends,” *Water Resources Research*, vol. 59, no. 12, Dec. 2023, doi: 10.1029/2023wr035829.

T. Houben, “Data accompanying the manuscript: Spectral Analysis of Groundwater Level Time Series for Robust Estimation of Aquifer Response Times.” *Zenodo*, 2025. doi: 10.5281/ZENODO.17610314.

von Jankiewicz, P.; Neumann, J.; Duijnsveld, W. H. M. et al.: Abflusshöhe- Sickerwasserrate - Grundwasserneubildung - Drei Themen im Hydrologischen Atlas von Deutschland. In: *Hydrologie und Wasserbewirtschaftung* 49 (2005), Nr. 1, S. 2-13.

R. Kumar, "Distributed Hydrologic Model Parameterization: Application in a Mesoscale River Basin," 2010.

A. Marx et al., "Auswirkungen des Klimawandels auf Wasserbedarf und -dargebot," *Wasserwirtschaft*, 2021.

S. Lee and H. Ajami, "Comprehensive assessment of baseflow responses to long-term meteorological droughts across the United States," *Journal of Hydrology*, vol. 626, p. 130256, Nov. 2023, doi: 10.1016/j.jhydrol.2023.130256.

Xu Liang , Dennis P. Lettenmaier , Eric F. Wood , Stephen J. Burges, "A simple hydrologically based model of land surface water and energy fluxes for general circulation models," *Journal of Geophysical Research: Atmospheres*, vol. 99, no. D7, pp. 14415–14428, Jul. 1994, doi: 10.1029/94jd00483.

X. Liang and Y.-K. Zhang, "Temporal and spatial variation and scaling of groundwater levels in a bounded unconfined aquifer," *Journal of Hydrology*, vol. 479, pp. 139–145, Feb. 2013, doi: 10.1016/j.jhydrol.2012.11.044.

S. Parry, C. Prudhomme, R. L. Wilby, and P. J. Wood, "Drought termination: Concept and characterisation," *Progress in Physical Geography: Earth and Environment*, vol. 40, no. 6, pp. 743–767, Aug. 2016, doi: 10.1177/0309133316652801.

L. Schmidt et al., "System for automated Quality Control (SaQC) to enable traceable and reproducible data streams in environmental science," *Environmental Modelling & Software*, vol. 169, p. 105809, Nov. 2023, doi: 10.1016/j.envsoft.2023.105809.

Zhang, Y. K., & Schilling, K. (2004). Temporal scaling of hydraulic head and river base flow and its implication for groundwater recharge. *Water Resources Research*, 40(3), W035041-W035049.
